# Supplementary material for: Polycyclic Aromatic Hydrocarbons and Pancreatic Cancer: An Analysis of the Blood Biomarker, r-1,t-2,3,c-4-Tetrahydroxy-1,2,3,4-tetrahydrophenanthrene and Selected Metabolism Gene SNPs
Source: MDPI journal article supplement (doi:10.3390/nu16050688), 2024-02-28
Supplement: s1 [file s1]

## Supplemental Table S1

*Summary descriptives table by groups of 'Pancreatic\_Cancer'*

|                  | Control<br>N=198 | Case<br>N=202 | OR               | p.overall |
|------------------|------------------|---------------|------------------|-----------|
| PheT             | 16.9 (11.1)      | 21.5 (25.1)   | 1.01 [1.00;1.03] | 0.018     |
| Smoked:          |                  |               |                  | 0.847     |
| Never            | 101 (51.0%)      | 106 (52.5%)   | Ref.             |           |
| Former           | 97 (49.0%)       | 96 (47.5%)    | 0.94 [0.64;1.40] |           |
| Sex:             |                  |               |                  | 0.815     |
| Female           | 82 (41.4%)       | 87 (43.1%)    | Ref.             |           |
| Male             | 116 (58.6%)      | 115 (56.9%)   | 0.93 [0.63;1.39] |           |
| Age              | 68.0 (10.7)      | 68.5 (10.4)   | 1.01 [0.99;1.02] | 0.600     |
| BMI              | 27.2 (4.67)      | 28.4 (5.66)   | 1.04 [1.00;1.09] | 0.029     |
| Pack_Years       | 10.6 (17.4)      | 9.65 (17.1)   | 1.00 [0.99;1.01] | 0.581     |
| Type_2_Diabetes: |                  |               |                  | <0.001    |
| No               | 180 (90.9%)      | 144 (71.3%)   | Ref.             |           |
| Yes              | 18 (9.09%)       | 58 (28.7%)    | 4.03 [2.27;7.14] |           |

*Summary descriptives table by groups of 'Pancreatic\_Cancer'*

|                              | <b>Control</b> | <b>Case</b> | <b>OR</b>                                | <b>p.overall</b> |
|------------------------------|----------------|-------------|------------------------------------------|------------------|
|                              | <b>N=188</b>   | <b>N=93</b> |                                          |                  |
| PheT per1000                 | 10.3 (7.65)    | 15.2 (19.9) | 1.03 [1.01;1.05]                         | 0.023            |
| Beer(drinks) per1000         | 0.66 (2.13)    | 0.55 (1.45) | 0.97 [0.84;1.12]                         | 0.586            |
| Wine(drinks) per1000         | 0.72 (1.45)    | 0.43 (1.01) | 0.82 [0.64;1.05]                         | 0.063            |
| Liquor(drinks) per1000       | 0.66 (1.42)    | 0.63 (1.28) | 0.98 [0.82;1.18]                         | 0.840            |
| Vegetables(servings) per1000 | 1.10 (0.69)    | 1.25 (0.77) | 1.31 [0.94;1.84]                         | 0.124            |
| Fruits(servings) per1000     | 0.97 (0.62)    | 1.21 (0.87) | 1.59 [1.12;2.26]                         | 0.016            |
| oz_meat per1000              | 1.95 (0.82)    | 2.06 (0.89) | 1.16 [0.87;1.56]                         | 0.325            |
| oz_meat_beefporklamb per1000 | 0.91 (0.55)    | 0.97 (0.55) | 1.21 [0.78;1.89]                         | 0.402            |
| oz_meat_organisms per1000    | 0.00 (0.01)    | 0.00 (0.01) | 2.980000e+01 [0.000000e+00;4.254489e+18] | 0.865            |
| Luncheon/Franks(oz) per1000  | 0.34 (0.30)    | 0.41 (0.41) | 1.67 [0.82;3.40]                         | 0.193            |
| oz_meat_poultry per1000      | 0.47 (0.40)    | 0.46 (0.43) | 0.93 [0.50;1.71]                         | 0.815            |
| Seafood(oz) per1000          | 0.23 (0.19)    | 0.23 (0.16) | 0.97 [0.24;3.86]                         | 0.961            |
| oz_meat_eggs per1000         | 0.26 (0.22)    | 0.34 (0.35) | 2.75 [1.06;7.14]                         | 0.062            |
| oz_meat_soy per1000          | 0.01 (0.09)    | 0.03 (0.11) | 10.1 [0.51;200]                          | 0.111            |
| Nuts(oz) per1000             | 0.31 (0.25)    | 0.23 (0.22) | 0.23 [0.07;0.78]                         | 0.013            |
| Alcohol(drinks) per1000      | 0.48 (0.72)    | 0.38 (0.62) | 0.79 [0.53;1.18]                         | 0.220            |
| svg_fruits_adjust per1000    | 0.90 (0.55)    | 0.98 (0.62) | 1.28 [0.83;1.96]                         | 0.279            |

|                        | <b>Control</b> | <b>Case</b>  | <b>OR</b>        | <b>p.overall</b> |
|------------------------|----------------|--------------|------------------|------------------|
|                        | <b>N=188</b>   | <b>N=93</b>  |                  |                  |
| svg_veg_adjust per1000 | 0.53 (0.31)    | 0.50 (0.29)  | 0.73 [0.32;1.67] | 0.445            |
| Meiqx per1000          | 18.5 (19.7)    | 25.3 (46.1)  | 1.01 [1.00;1.02] | 0.178            |
| Phip per1000           | 39.7 (46.1)    | 62.1 (142)   | 1.00 [1.00;1.01] | 0.143            |
| Dimeiqx per1000        | 1.10 (1.23)    | 1.88 (5.34)  | 1.13 [0.96;1.32] | 0.170            |
| actual per1000         | 2617 (2576)    | 4575 (14330) | 1.00 [1.00;1.00] | 0.197            |
| predict per1000        | 2609 (2500)    | 3620 (6722)  | 1.00 [1.00;1.00] | 0.166            |
| Bap per1000            | 12.7 (16.6)    | 15.8 (19.5)  | 1.01 [1.00;1.02] | 0.194            |
| Meiqx_red per1000      | 17.3 (19.5)    | 24.0 (45.6)  | 1.01 [1.00;1.02] | 0.182            |
| Phip_red per1000       | 22.2 (33.1)    | 39.2 (134)   | 1.00 [1.00;1.01] | 0.236            |
| Dimeiqx_red per1000    | 0.90 (1.16)    | 1.69 (5.26)  | 1.14 [0.96;1.36] | 0.161            |
| actual_red per1000     | 1918 (2322)    | 3663 (14069) | 1.00 [1.00;1.00] | 0.240            |
| predict_red per1000    | 2227 (2446)    | 3199 (6520)  | 1.00 [1.00;1.00] | 0.170            |
| Bap_red per1000        | 10.5 (15.3)    | 12.5 (17.3)  | 1.01 [0.99;1.02] | 0.348            |
| Meiqx_white per1000    | 1.19 (1.75)    | 1.32 (2.21)  | 1.04 [0.91;1.18] | 0.607            |
| Phip_white per1000     | 17.5 (28.7)    | 23.0 (32.6)  | 1.01 [1.00;1.01] | 0.171            |
| Dimeiqx_white per1000  | 0.20 (0.47)    | 0.19 (0.34)  | 0.98 [0.55;1.77] | 0.954            |
| actual_white per1000   | 699 (1057)     | 912 (1341)   | 1.00 [1.00;1.00] | 0.184            |
| predict_white per1000  | 381 (575)      | 421 (533)    | 1.00 [1.00;1.00] | 0.572            |

|                                    | <b>Control</b> | <b>Case</b> | <b>OR</b>        | <b>p.overall</b> |
|------------------------------------|----------------|-------------|------------------|------------------|
|                                    | <b>N=188</b>   | <b>N=93</b> |                  |                  |
| Bap_white per1000                  | 2.14 (4.63)    | 3.23 (6.87) | 1.03 [0.99;1.08] | 0.169            |
| Meat(g) per1000                    | 55.4 (23.3)    | 58.5 (25.3) | 1.01 [1.00;1.02] | 0.325            |
| Red_Meat(g) per1000                | 35.7 (19.8)    | 39.1 (20.5) | 1.01 [1.00;1.02] | 0.182            |
| White_Meat(g) per1000              | 19.7 (13.5)    | 19.3 (13.9) | 1.00 [0.98;1.02] | 0.826            |
| g_red_proc per1000                 | 9.83 (8.62)    | 11.6 (11.5) | 1.02 [0.99;1.04] | 0.193            |
| g_red_raremed per1000              | 3.98 (6.20)    | 3.43 (6.40) | 0.99 [0.95;1.03] | 0.495            |
| Very_Well_Done_Red_Meat(g) per1000 | 6.80 (7.09)    | 4.10 (4.09) | 0.91 [0.87;0.97] | <0.001           |
| BBQ_Red_Meat(g) per1000            | 4.30 (4.76)    | 3.20 (4.82) | 0.95 [0.89;1.01] | 0.070            |
| Not_BBQ_Red_Meat(g) per1000        | 6.49 (6.90)    | 4.34 (4.44) | 0.93 [0.88;0.98] | 0.002            |
| Br_Red_Meat(g) per1000             | 0.77 (1.84)    | 0.61 (1.63) | 0.94 [0.81;1.10] | 0.445            |
| Not_Br_Red_Meat(g) per1000         | 10.0 (8.95)    | 6.93 (6.83) | 0.95 [0.91;0.98] | 0.002            |
| Pf_Red_Meat(g) per1000             | 3.60 (5.48)    | 2.01 (2.91) | 0.90 [0.82;0.98] | 0.002            |
| Not_Pf_Red_Meat(g) per1000         | 7.25 (6.59)    | 5.58 (6.21) | 0.96 [0.91;1.00] | 0.039            |
| HEME_IRON per1000                  | 264 (207)      | 297 (430)   | 1.00 [1.00;1.00] | 0.474            |
| RHEME_IRON per1000                 | 244 (204)      | 275 (428)   | 1.00 [1.00;1.00] | 0.511            |
| WHEME_IRON per1000                 | 19.3 (21.7)    | 22.2 (26.7) | 1.01 [0.99;1.02] | 0.364            |
| NRITE_CLDCUT_POUL_MEAS per1000     | 0.01 (0.02)    | 0.00 (0.02) | 0.00 [0.00;1666] | 0.140            |
| Nitrite_Ham_Lunch_Meats per1000    | 0.03 (0.06)    | 0.01 (0.03) | 0.00 [0.00;0.01] | <0.001           |

|                                     | <b>Control</b>      | <b>Case</b>        | <b>OR</b>                                | <b>p.overall</b> |
|-------------------------------------|---------------------|--------------------|------------------------------------------|------------------|
|                                     | <b><i>N=188</i></b> | <b><i>N=93</i></b> |                                          |                  |
| Nitrite_Coldcuts per1000            | 0.02 (0.03)         | 0.01 (0.02)        | 0.00 [0.00;0.00]                         | <0.001           |
| Nitrite_Hotdogs per1000             | 0.00 (0.00)         | 0.00 (0.01)        | 1.837598e+25 [1.283000e+03;2.632432e+47] | 0.044            |
| Nitrite_Ham per1000                 | 0.01 (0.01)         | 0.01 (0.03)        | 12038 [2.000000e-02;8147439049]          | 0.217            |
| Nitrite_Bacon per1000               | 0.00 (0.01)         | 0.00 (0.00)        | 0.00 [0.00;364439686890]                 | 0.292            |
| Nitrite_Sausage per1000             | 0.00 (0.01)         | 0.00 (0.00)        | 0.00 [0.00;0.00]                         | 0.002            |
| Total_Nitrite per1000               | 0.08 (0.09)         | 0.05 (0.06)        | 0.00 [0.00;0.15]                         | 0.001            |
| Fruits/Vegetables(servings) per1000 | 2.07 (1.14)         | 2.46 (1.43)        | 1.28 [1.05;1.55]                         | 0.022            |
